# Supplementary material for: Development of a Passive Liquid Valve (PLV) Utilizing a Pressure Equilibrium Phenomenon on the Centrifugal Microfluidic Platform
Source: Sensors (Basel). 2015 Feb 25;15(3):4658–76. doi: 10.3390/s150304658 (PMC4435176; doi:10.3390/s150304658)
Supplement: Supplementary File 1 [file sensors-15-04658-s001.pdf]

## Development of Passive Liquid Valve (PLV) Utilizing a Pressure Equilibrium Phenomenon on the Centrifugal Microfluidic Platform. *Sensors* 2015, 15, 4658-4676

Wisam Al-Faqheri <sup>1,2</sup>, Fatimah Ibrahim <sup>1,2,\*</sup>, Tzer Hwai Gilbert Thio <sup>1,2,3</sup>, Norulain Bahari <sup>1,2</sup>, Hamzah Arof <sup>1,2,4</sup>, Hussin A. Rothan <sup>7</sup>, Rohana Yusof <sup>7</sup>, Marc Madou <sup>1,2,5,6</sup>

<sup>1</sup> Centre for Innovation in Medical Engineering (CIME), Faculty of Engineering, University of Malaya, 50603 Kuala Lumpur, Malaysia; E-Mails: wisamfakhri83@yahoo.com (W.A.-F.); ainbahari@yahoo.com (N.B.)

<sup>2</sup> Department of Biomedical Engineering, Faculty of Engineering, University of Malaya, 50603 Kuala Lumpur, Malaysia

<sup>3</sup> Faculty of Science, Technology, Engineering and Mathematics, INTI International University, Persiaran Perdana BBN, Putra Nilai, 71800 Nilai, Negeri Sembilan, Malaysia; E-Mail: gilbert\_thio@hotmail.com

<sup>4</sup> Department of Electrical Engineering, Faculty of Engineering, University of Malaya, 50603 Kuala Lumpur, Malaysia; E-Mail: ahamzah@um.edu.my

<sup>5</sup> Department of Biomedical Engineering, University of California, Irvine, 92697 CA, USA; E-Mail: mmadou@uci.edu

<sup>6</sup> Department of Mechanical and Aerospace Engineering, University of California, Irvine, 92697 CA, USA

<sup>7</sup> Department of Molecular Medicine, Faculty of Medicine, University of Malaya, 50603 Kuala Lumpur, Malaysia; E-Mails: rothan@um.edu.my (H.A.R.); rohana@um.edu.my (R.Y.)

\* Author to whom correspondence should be addressed; E-Mail: fatimah@um.edu.my; Tel.: + 603-7967-6818, Fax: +603-7967-6878.

---

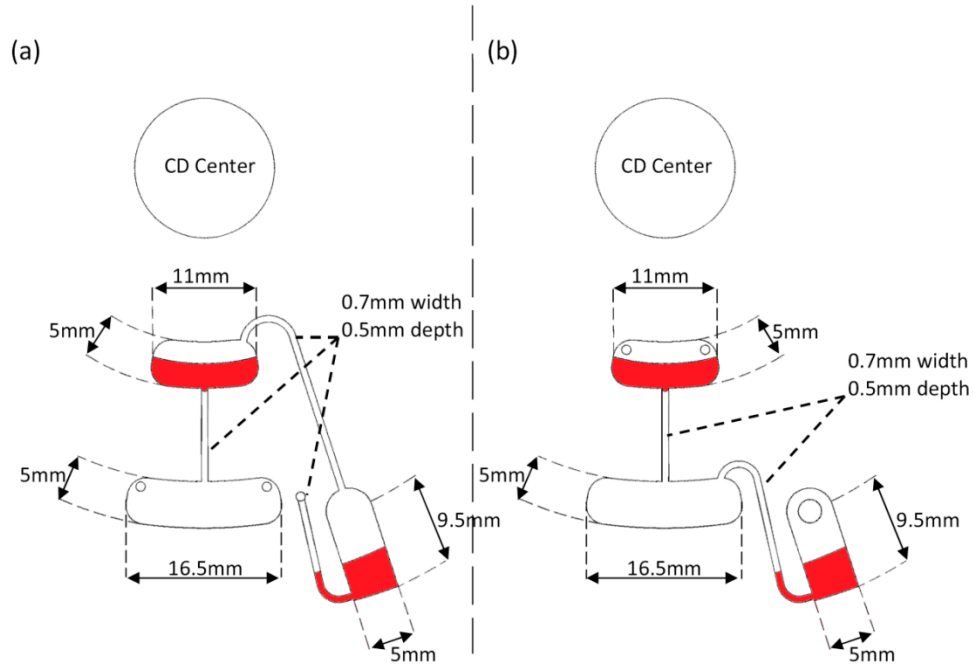

**Figure S1.** (a) and (b) respectively shows the designs specification of S-PLV and D-PLV. As mentioned in the main manuscript, both designs are consists of three main chambers: source chamber, destination chamber and venting chamber. The three chambers are connected together with liquid channels and venting channels. *Source chamber*: 5 mm height, 11 mm width, 1 mm depth; *Destination chamber*: 5 mm height, 16.5 mm width, 1 mm depth; *Venting chamber*: 9.5 mm height, 5 mm width, 2.5 mm depth; *Venting and liquid channels*: all 0.7 mm width and 0.5 mm depth.

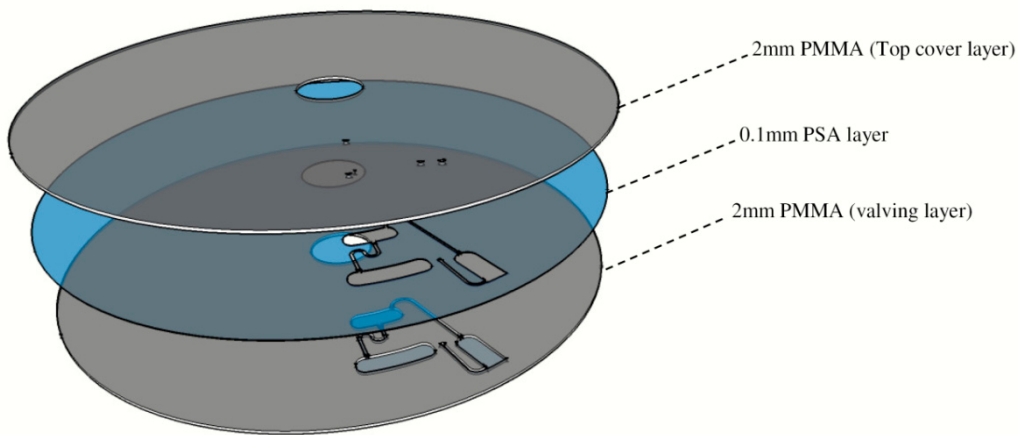

**Figure S2.** The microfluidic CD fabricated for this experiment consists of three layers: two PMMA layers and one PSA layer. The main microfluidic design presented in Figure S1 is engraved in the bottom 4mm PMMA layer. The Top PMMA layers acts like a cover with only venting and alignment holes are drilled through. Finally, 0.1 mm PSA adhesive layer is utilized to bind the two PMMA layers together.

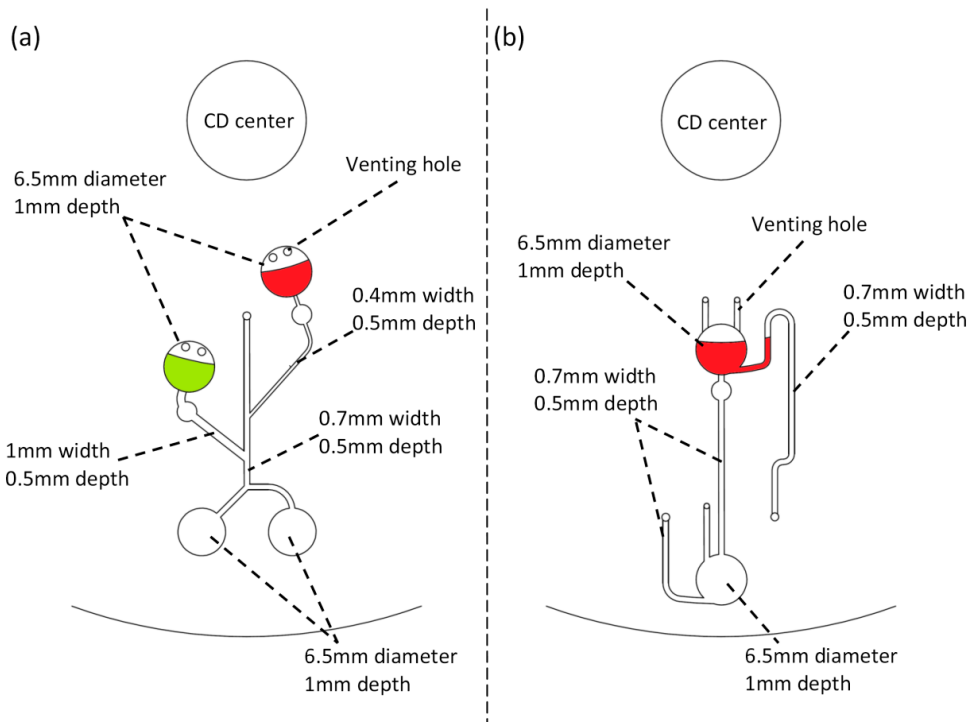

**Figure S3.** Dimensions details for the liquid switching experiment. *Switching layer*: source chambers and destination chambers are 6.5 mm diameter and 1mm depth. Source chamber A liquid channel is 1 mm width and 0.5 mm depth. Source chamber B liquid channel is 0.4 mm width by 0.5 mm depth. All the other channels are 0.7 mm width by 0.5 mm depth. *Venting layer*: Venting chamber A and B are 6.5 mm diameter and 1 mm depth. All the liquid and venting channels are 0.7 mm width and 0.5 mm depth.

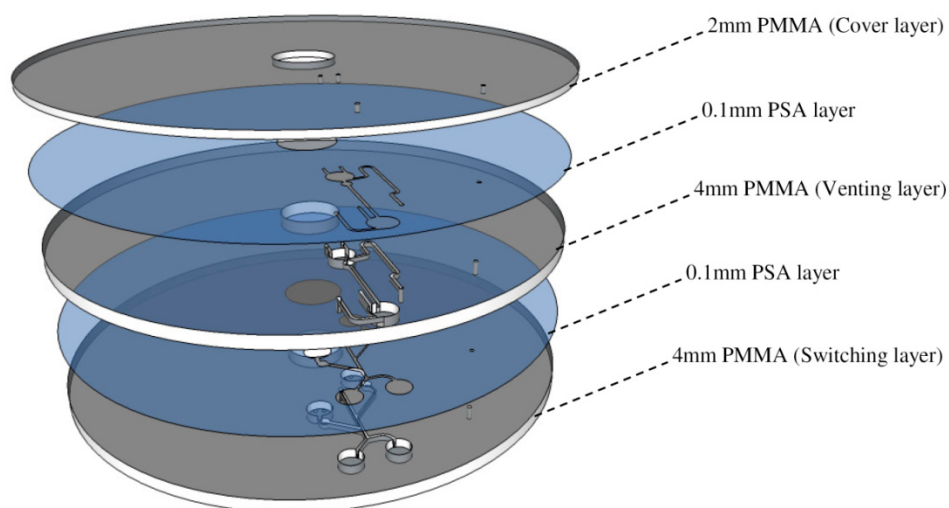

**Figure S4.** Liquid switching microfluidic CD layers. *Top layer*: 2 mm PMMA with only venting holes cut-through (cover layer). *Second layer*: 0.1 PSA with the venting layer design cut-through. *Third layer*: 4 mm PMMA where the venting design in Figure S3b engraved-in (venting layer). *Fourth layer*: 0.1 PSA adhesive layer with the switching design cut-through. *Fifth layer*: 4 mm PMMA layer where the switching design in Figure S3a engraved-in.

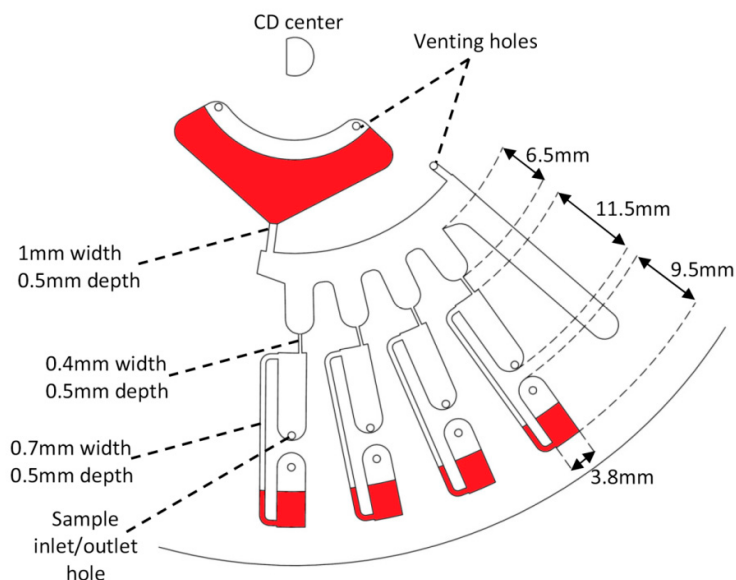

**Figure S5.** Liquid metering microfluidic CD design. **Chambers:** *Metering chambers:* 3.8 mm width, 6.5 mm length, and 4 mm depth; *Destination chambers:* 3.8 mm width, 11.5 mm length, and 4 mm depth; *Venting chambers:* 3.8 mm width, 9.5 mm length, and 2.5 mm depth; **Channels:** *Source chamber liquid channel:* 1 mm width and 0.5 mm depth; *Metering chambers channel to the destination chambers:* 0.4 mm width and 0.5 mm depth; *Venting channels:* 0.7 mm width and 0.5 mm depth.

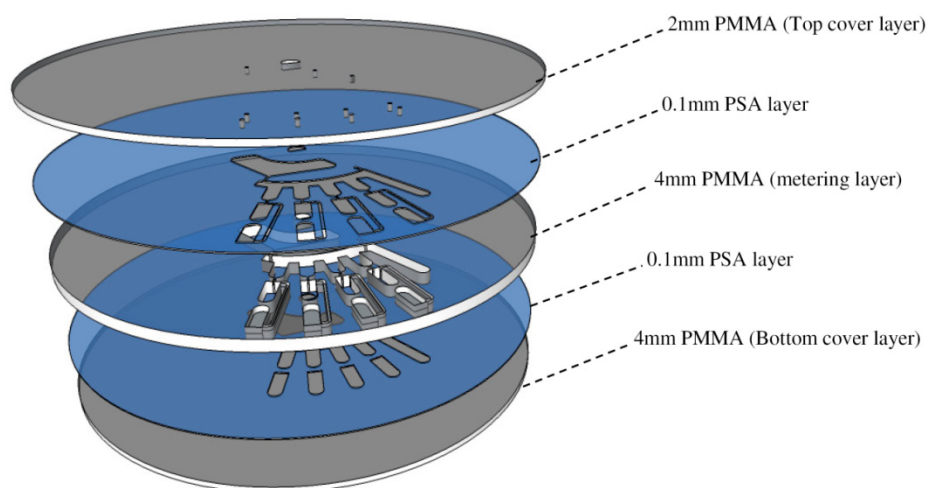

**Figure S6** Liquid metering microfluidic CD layers. *Top layer:* 2 mm PMMA with only venting holes cut-through (cover layer). *Second layer:* 0.1 PSA with the metering design cut-through. *Third layer:* 4 mm PMMA where the venting design in Figure 5 engraved-in (venting layer). *Fourth layer:* 0.1 PSA adhesive layer with the metering design cut-through. *Fifth layer:* 2 mm PMMA layer (bottom cover layer).
